# Supplementary material for: Stoichiometric ratios support plant adaption to grazing moderated by soil nutrients and root enzymes
Source: PeerJ. 2019 Jun 10;7:e7047. doi: 10.7717/peerj.7047 (PMC6563791; doi:10.7717/peerj.7047)
Supplement: File S1 — NR is nitrate reductase, GS is glutamine synthase and ACP is acid phosphatase [file peerj-07-7047-s001.xlsx]

## Sheet: raw data1
Treatment	Species	Leaf C(g/kg)	Stem C(g/kg)	Root C(g/kg)	Leaf N(g/kg)	Stem N(g/kg)	Root N(g/kg)	Leaf P(g/kg)	Stem P(g/kg)	Root P(g/kg)	Leaf C:N	Leaf C:P	Leaf N:P	Stem C:N	Stem C:P	Stem N:P	Root C:N	Root C:P	Root N:P	NR activity (μmol/(h • g))	GS activity (μ/g)	ACP activity (μmol/(min • g))
Enclosure	Leymus chinensis	330.955	206.927	200.534	18.956	10.048	10.091	0.477781	0.396	0.538161	17.4591	692.691	39.6751	20.5938	522.542	25.3737	19.8726	372.629	18.7509	0.441056	5.86901	2.30601
	Leymus chinensis	243.3	271.402	192	17.595	12.576	8.706	0.404945	0.484802	0.469957	13.8278	600.822	43.4503	21.5809	559.821	25.9405	22.0538	408.548	18.5251	0.507278	6.668	2.21364
	Leymus chinensis	329.85	220.493	212.049	20.038	6.931	9.578	0.43793	0.391251	0.516095	16.4612	753.202	45.7561	31.8125	563.558	17.715	22.1392	410.871	18.5586	0.462823	5.89264	2.30675
	Leymus chinensis	323.491	202.396	211.773	19.882	10.793	7.072	0.5666	0.545845	0.390625	16.2705	570.933	35.09	18.7526	370.795	19.773	29.9453	542.139	18.1043	0.491823	6.02759	2.27306
	Leymus chinensis	233.301	204.358	203.591	16.05	11.202	8.975	0.49315	0.451318	0.363702	14.5359	473.083	32.5459	18.243	452.802	24.8206	22.6842	559.774	24.6768	0.500691	6.03949	2.01354
	Artemisia frigida	278.447	191.455	172.783	21.366	6.285	10.851	1.08509	0.293782	0.489425	13.0322	256.612	19.6905	30.4621	651.688	21.3934	15.9232	353.032	22.1709	0.53	7.04	1.39
	Artemisia frigida	333.857	214.65	189.9	27.489	11.579	9.114	0.909158	0.440058	0.396681	12.1451	367.216	30.2357	18.5379	487.776	26.3124	20.8361	478.722	22.9756	0.53	6.96	1.43
	Artemisia frigida	312.353	188.532	160.237	22.256	11.163	7.497	0.87807	0.341213	0.451197	14.0345	355.727	25.3465	16.889	552.536	32.7157	21.3735	355.138	16.6158	0.583848	6.55434	1.48243
	Artemisia frigida	283.364	209.42	189.273	23.547	8.775	10.157	0.882512	0.293197	0.512234	12.034	321.088	26.6818	23.8656	714.265	29.9287	18.6347	369.505	19.8288	0.635224	7.67562	1.41976
	Artemisia frigida	303.158	190.423	195.366	24.493	9.315	9.635	0.936407	0.382599	0.330482	12.3773	323.746	26.1564	20.4426	497.708	24.3467	20.2767	591.154	29.1544	0.5533	7.33793	1.39021
Grazing	Leymus chinensis	267.246	201.682	279.286	26.602	10.848	9.154	0.501188	0.615709	0.39643	10.0461	533.226	53.0779	18.5916	327.56	17.6187	30.5097	704.502	23.0911	0.561905	6.25794	1.22255
	Leymus chinensis	364.158	284.101	198.802	35.26	13.162	10.995	0.769276	0.761613	0.51711	10.3278	473.378	45.8353	21.585	373.026	17.2817	18.0811	384.448	21.2624	0.504088	6.40279	1.23339
	Leymus chinensis	264.171	208.909	211.5	31.519	17.124	8.251	0.756139	0.732263	0.485397	8.38131	349.368	41.6841	12.1998	285.293	23.385	25.6333	435.726	16.9985	0.503497	6.41558	1.39021
	Leymus chinensis	233.591	207.647	213.861	28.507	15.445	10.972	0.511746	0.765136	0.393322	8.19416	456.459	55.7054	13.4443	271.386	20.1859	19.4916	543.731	27.8957	0.488756	7.14627	1.41838
	Leymus chinensis	350	192.545	207.014	28.085	18.521	11.068	0.558377	0.81349	0.523776	12.4622	626.817	50.2975	10.3961	236.691	22.7673	18.7039	395.234	21.1312	0.46883	7.13668	1.31379
	Artemisia frigida	321.45	210.583	196.682	21.829	12.444	13.198	0.862374	0.896934	0.642479	14.7258	372.75	25.3127	16.9224	234.78	13.8739	14.9024	306.13	20.5423	0.877368	7.23629	3.52841
	Artemisia frigida	354.878	199.479	192.286	26.652	14.396	14.987	0.899932	0.74471	0.827345	13.3153	394.339	29.6156	13.8565	267.861	19.331	12.8302	232.413	18.1146	0.9488	7.296	3.28121
	Artemisia frigida	327.273	186.682	177.409	23.376	11.764	9.294	0.927734	0.719888	0.604529	14.0004	352.766	25.1969	15.8689	259.32	16.3414	19.0886	293.466	15.3739	0.842358	7.28871	3.54723
	Artemisia frigida	331.512	196.849	190.775	25.053	13.431	12.045	0.9056	0.8247	0.6894	13.2324	366.069	27.6645	14.6563	238.692	16.2859	15.8385	276.726	17.4717	0.88995	7.41095	3.07289
	Artemisia frigida	322	204.384	197.455	26.694	14.883	10.911	1.08186	0.928661	0.674162	12.0626	297.636	24.6742	13.7327	220.085	16.0263	18.0968	292.889	16.1845	0.940337	7.19326	3.42607
