# Supplementary material for: Stoichiometric ratios support plant adaption to grazing moderated by soil nutrients and root enzymes
Source: PeerJ. 2019 Jun 10;7:e7047. doi: 10.7717/peerj.7047 (PMC6563791; doi:10.7717/peerj.7047)
Supplement: File S2 — N is nitrogen, P is phosphorus [file peerj-07-7047-s002.xlsx]

## Sheet: Raw data2
Treatment	Total N (g/kg)	Total P (g/kg)	Available N (mg/kg)	Available P (mg/kg)	TotalN:TotalP	AvailableN:AvailableP
Enclosure	1.181	0.264791	60.75	4.93419	4.46013	12.3121
Enclosure	1.17	0.248794	57.75	4.29376	4.70269	13.4498
Enclosure	1.481	0.234106	54.25	4.97242	6.32619	10.9102
Enclosure	1.15	0.223421	50.75	5.05061	5.14723	10.0483
Enclosure	1.0477	0.211663	45.5	5.30777	4.94985	8.57234
Enclosure	1.274	0.281994	49	3.78976	4.51783	12.9296
Enclosure	1.231	0.216572	48.5	4.56976	5.68401	10.6132
Enclosure	1.334	0.218105	56	4.05803	6.11631	13.7998
Enclosure	1.352	0.294033	58	4.7674	4.59812	12.166
Enclosure	1.193	0.221141	52.5	5.8884	5.39475	8.91583
Grazing	0.978	0.192497	38.5	7.97721	5.08061	4.82625
Grazing	0.954	0.193073	31.5	8.09525	4.94113	3.89117
Grazing	0.915	0.189625	31.5	8.1079	4.82532	3.8851
Grazing	0.874	0.215536	35	9.13254	4.05501	3.83245
Grazing	1.156	0.208006	45.5	7.21377	5.55752	6.30739
Grazing	0.986	0.196778	38.5	7.86928	5.01072	4.89244
Grazing	1.094	0.231718	31.5	7.35522	4.72127	4.28267
Grazing	0.733	0.147006	34.5	6.12457	4.98619	5.63305
Grazing	0.808	0.162041	33.5	8.11233	4.9864	4.12952
Grazing	0.83	0.195595	36.75	8.06175	4.24347	4.55857
